# Supplementary material for: Assessing the Confidence and Competency of Nurses in the Management of Pharmacotherapy in Older Patients: a Cross-sectional Study
Source: Research Square preprint supplement (doi:10.21203/rs.3.rs-8348146/v1), 2026-01-13
Supplement: Supplementary file 1 [file e6534d3e91b3d12c93aee985.docx]

**ONLINE APPENDIX**

**Supplementary Table 1.** Comparison between participants with complete data from Southern Italy vs. those from Northern and Central combined.

|  | **Southern Italy (n=79)** | **Northern and Central Italy (n=84)** | **p value** |
| --- | --- | --- | --- |
| Males  Age (years) | 27 (34.2) | 13 (15.7) | 0.006 |
| <35 | 45 (57.0) | 28 (33.4) | <0.001§ |
| 35-44 | 16 (20.3) | 11 (13.1) |
| 45-54 | 13 (16.5) | 23 (27.4) |
| 55+ | 5 (6.3) | 22 (26.2) |
| Years after graduation | 19 [8.25, 29] | 9 [6,17] | <0.001 |
|  |  |  |  |
| Post-graduate degree | 52 (65.8) | 31 (36.9) | <0.001 |
| Formal Geriatrics education | 23 (29.1) | 33 (39.3) | 0.172 |
| Confidence with scientific English | 3[2,4] | 3[2,3] | 0.003 |
| Confidence with bibliographic search engines | 3 [3,4] | 3 [2,4] | 0.051 |
| Years after graduation | 19 [8.25, 29] | 9 [6,17] | <0.001 |

Values are N (%) or median [IQR].

§ for trend value.
